# Supplementary material for: Green Synthesis of Titanium Dioxide Nanoparticles Using Ocimum sanctum Leaf Extract: In Vitro Characterization and Its Healing Efficacy in Diabetic Wounds
Source: MDPI journal article supplement (doi:10.3390/molecules27227712), 2022-11-09
Supplement: s1 [file s1]

**Supplementary Table S1. Qualitative phytochemical screening of *Ocimum sanctum* extract**

| S/No | Bioactive phytochemicals | Test /Reagents                                  | Result |
|------|--------------------------|-------------------------------------------------|--------|
| 1    | Alkaloids                | Mayer's reagent                                 | +      |
| 2    | Flavonoids               | Alkaline reagent test                           | +      |
| 3    | Saponins                 | Frothing test                                   | +      |
| 4    | Tannins                  | a) Lead acetate test<br>b) Ferric chloride test | +      |
| 5    | Terpenoids & Steroids    | Salkowski test                                  | +      |
| 6    | Phenols                  | Ferric chloride test                            | +      |
| 7    | Anthraquinones           | Bontrager's test                                | -      |
| 8    | Proteins                 | Biuret's test                                   | +      |
| 9    | Carbohydrate             | Felhing's test                                  | +      |
| 10   | Fixed oil or fatty acid  | Spot test                                       | +      |

Note: +Present, and - Absent.1

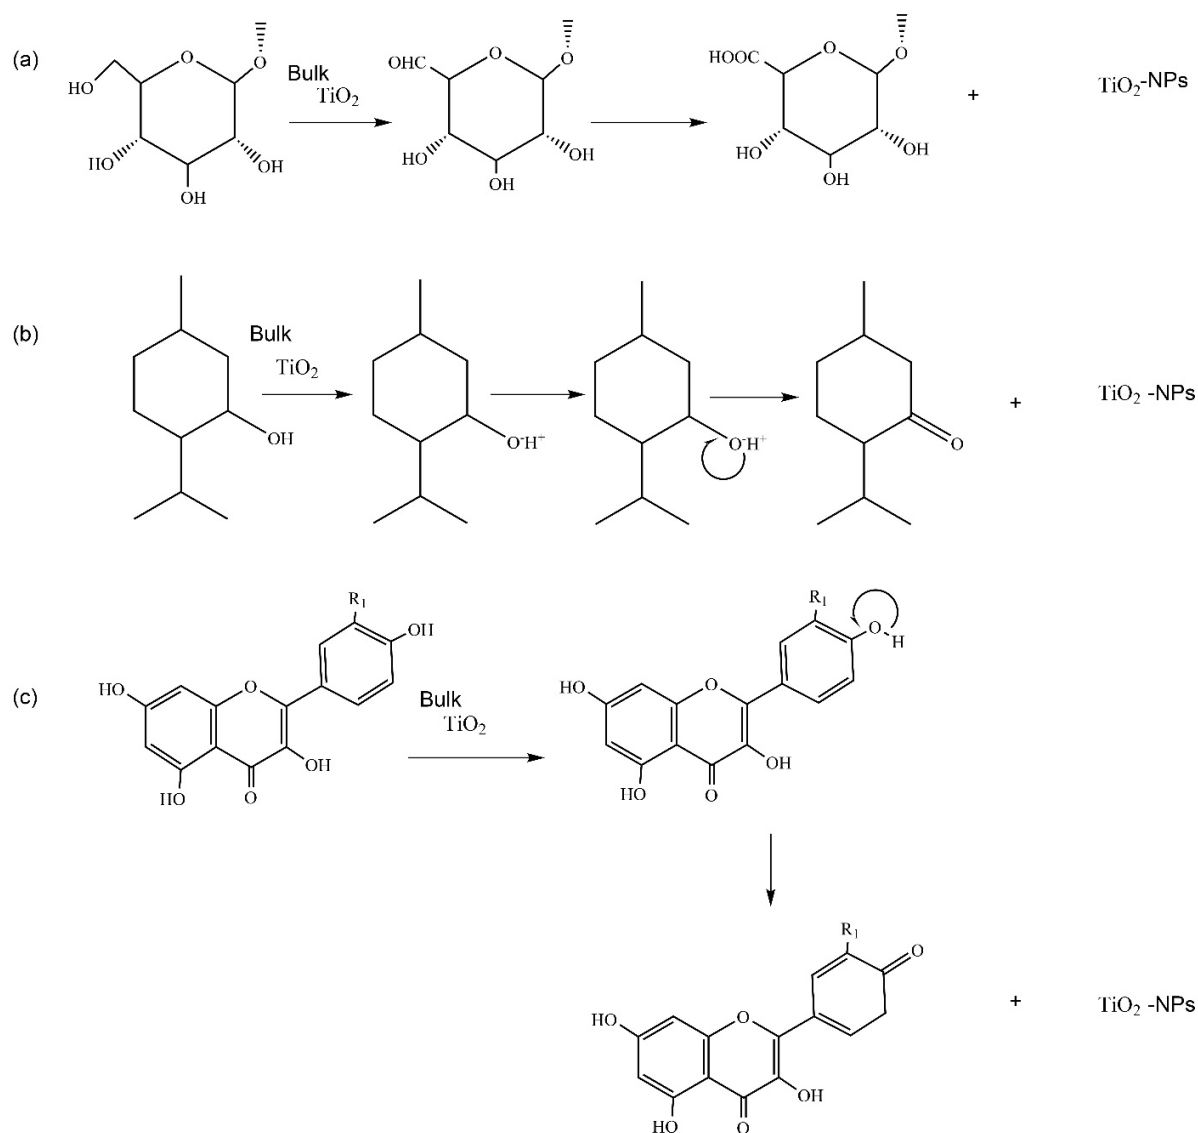

Supplementary Figure S1. Proposed bioproduction mechanism for  $\text{TiO}_2\text{NPs}$  by phytochemicals. (a). Biosynthesis of  $\text{TiO}_2$  through saponins mediated bio-reduction. (b). Biosynthesis of  $\text{TiO}_2$  through terpenoids mediated bio-reduction. (c). Biosynthesis of  $\text{TiO}_2$  through flavonoids mediated bio-reduction.
